# Supplementary material for: Behaviour of Extractives in Norway Spruce (Picea abies) Bark during Pile Storage
Source: MDPI journal article supplement (doi:10.3390/molecules27041186), 2022-02-10
Supplement: s1 [file s1]

## Supporting material

Tabulated values of the results presented in the article.

**Table S1.** Values for Figure 1.

| Bark Pile                   | UC <sup>a</sup> | UC              | UC              | UC              | UC   | UC   | UC   | UC   | UC   | UC   | C <sup>b</sup> | C    | C    | C    |
|-----------------------------|-----------------|-----------------|-----------------|-----------------|------|------|------|------|------|------|----------------|------|------|------|
| Storage week                | 0               | 4M <sup>c</sup> | 4S <sup>d</sup> | 4T <sup>e</sup> | 12M  | 12S  | 12T  | 24M  | 24S  | 24T  | 0              | 24M  | 24S  | 24T  |
| Hot water extract (%)       | 33.5            | 20.3            | 17.4            | 14.6            | 16.4 | 11.5 | 8.9  | 14.3 | 9.2  | 7.3  | 30.6           | 13.7 | 5    | 5.7  |
| Hot water extract SD        | 0.7             | 0.9             | 0.8             | 1.4             | 0.3  | 0.1  | 0.3  | 0.2  | 0.2  | 1.4  | 0.2            | 0.3  | 0.1  | 0    |
| Hexane extract (%)          | 4.1             | 4.4             | 4.1             | 3.8             | 3.8  | 4    | 3.6  | 4.1  | 3.4  | 3    | 4.3            | 4.9  | 3.4  | 3.6  |
| Hexane extract SD           | 0.01            | 0.2             | 0.001           | 0.2             | 0.1  | 0.1  | 0.01 | 0.04 | 0.04 | 0.1  | 0.002          | 0.03 | 0.1  | 0.03 |
| Holocellulose (%)           |                 |                 |                 |                 |      |      |      |      |      |      | 35.1           | 34.8 | 40.4 | 38.2 |
| Holocellulose SD            |                 |                 |                 |                 |      |      |      |      |      |      | 0.6            | 0.8  | 1.3  | 0.7  |
| Cellulose (%)               | 17.2            |                 |                 |                 |      |      |      | 17   | 15.7 | 15.3 |                |      |      |      |
| Cellulose SD                | 0.5             |                 |                 |                 |      |      |      | 0.4  | 0.6  | 0.7  |                |      |      |      |
| Hemicellulose (%)           | 19.2            | 19.5            | 17.4            | 18.8            | 20.6 | 21.9 | 20.3 | 19.6 | 22.8 | 21.2 |                |      |      |      |
| Hemicellulose SD            | 0.3             | 0.004           | 0.6             | 1.5             | 1.5  | 2.6  | 0.8  | 0.1  | 0.2  | 2    |                |      |      |      |
| Lignin (acid-insoluble) (%) | 16.8            |                 |                 |                 |      |      |      | 35.8 | 39.8 | 44.4 | 17.4           | 33.8 | 37.6 | 35.9 |
| Lignin (acid-insoluble) SD  | 0.4             |                 |                 |                 |      |      |      | 0.4  | 1.6  | 2.5  | 0.8            | 0.4  | 1.2  | 1.3  |
| Lignin (acid-soluble) (%)   | 0.7             |                 |                 |                 |      |      |      | 0.7  | 0.8  | 0.8  | 0.7            | 0.7  | 1    | 0.8  |
| Lignin (acid-soluble) SD    | 0.1             |                 |                 |                 |      |      |      | 0.04 | 0.02 | 0.02 | 0.02           | 0.2  | 0.03 | 0.04 |
| Unidentified (%)            | 8.5             | 55.8            | 61.1            | 62.8            | 59.2 | 62.7 | 67.2 | 8.4  | 8.3  | 8    | 11.9           | 12.1 | 12.6 | 15.7 |
| Unidentified SD             | 1.7             | 1.1             | 1.4             | 0.04            | 1    | 2.8  | 0.5  | 0.2  | 0.5  | 1.7  | 0.2            | 0.4  | 1.1  | 1.4  |

<sup>a</sup> Uncovered <sup>b</sup> Covered with snow <sup>c</sup> Middle <sup>d</sup> Side <sup>e</sup> Top.

Table S2. Values for Figure 3.

| Bark Pile                       | UC <sup>a</sup> | UC              | UC              | UC              | UC   | UC   | UC   | UC   | UC   | UC   | C <sup>b</sup> | C     | C      | C     |
|---------------------------------|-----------------|-----------------|-----------------|-----------------|------|------|------|------|------|------|----------------|-------|--------|-------|
| Storage week                    | 0               | 4M <sup>c</sup> | 4S <sup>d</sup> | 4T <sup>e</sup> | 12M  | 12S  | 12T  | 24M  | 24S  | 24T  | 0              | 24M   | 24S    | 24T   |
| Resin acids<br>(mg/g of d.m.)   | 14.1            | 10.3            | 8.6             | 8.8             | 8    | 7.5  | 9.1  | 8.5  | 7.5  | 8.8  | 12.2           | 9.7   | 9.6    | 8.1   |
| Resin acids<br>SD               | 2.2             | 0.5             | 0.2             | 0.1             | 0.2  | 0.1  | 0.03 | 0.02 | 0.2  | 0.3  | 0.3            | 0.2   | 0.2    | 0.01  |
| Fatty acids<br>(mg/g of d.m.)   | 9.5             | 8.1             | 7.4             | 7.3             | 8.7  | 4.2  | 4.9  | 8.4  | 2.8  | 2.1  | 10             | 8.9   | 3.4    | 6.5   |
| Fatty acids<br>SD               | 0.3             | 0.2             | 0.3             | 0.3             | 0.1  | 0.03 | 0.02 | 0.1  | 0.04 | 0.2  | 0.03           | 0.004 | 0.0004 | 0.4   |
| Diterpenoids<br>(mg/g of d.m.)  | 4.1             | 3.2             | 2.2             | 2.3             | 1.8  | 2    | 2.4  | 1.9  | 2.1  | 2.7  | 3.9            | 2.4   | 2.6    | 2.2   |
| Diterpenoids<br>SD              | 0.6             | 0.2             | 0.04            | 0.05            | 0.03 | 0.02 | 0.02 | 0.01 | 0.1  | 0.1  | 0.1            | 0.1   | 0.01   | 0.001 |
| Sterols<br>(mg/g of d.m.)       | 3.3             | 4.3             | 3.2             | 2.9             | 3.4  | 3.6  | 3.3  | 2.9  | 2.7  | 2.7  | 3.3            | 2.9   | 2.5    | 2.9   |
| Sterols<br>SD                   | 0.1             | 0.2             | 0.2             | 0.2             | 0.3  | 0.3  | 0.1  | 0.3  | 0.1  | 0.1  | 0.02           | 0.1   | 0.01   | 0.1   |
| Steryl esters<br>(mg/g of d.m.) | 0.6             | 0.5             | 0.4             | 0.4             | 1    | 0.5  | 0.6  | 1.7  | 0.5  | 0.7  | 1.1            | 1.5   | 0.8    | 0.7   |
| Steryl esters<br>SD             | 0.1             | 0.1             | 0.2             | 0.1             | 0.4  | 0.01 | 0.1  | 0.1  | 0.1  | 0.1  | 0.1            | 0.04  | 0.1    | 0.1   |
| Triglycerides<br>(mg/g of d.m.) | 2.6             | 10.9            | 14.6            | 11.9            | 12.5 | 17.3 | 12.7 | 17.6 | 18.1 | 12.6 | 6.4            | 21.7  | 14.5   | 15.6  |
| Triglycerides<br>SD             | 2.5             | 0.7             | 0.7             | 1.1             | 0.2  | 0.5  | 1.6  | 0.4  | 0.7  | 0.2  | 0.2            | 0.2   | 0.5    | 0.1   |
| Others<br>(mg/g of d.m.)        | 2.6             | 3.6             | 2.6             | 2.3             | 2.5  | 2.5  | 2.4  | 2.1  | 1.3  | 0.9  | 2.7            | 2.1   | 1.3    | 1.9   |
| Others<br>SD                    | 0.3             | 0.2             | 0.2             | 0.2             | 0.1  | 0.3  | 0.01 | 0.2  | 0.1  | 0.1  | 0.02           | 0.1   | 0.02   | 0.03  |
| Unidentified<br>(mg/g of d.m.)  | 5.9             | 4.3             | 3.4             | 3.5             | 2.7  | 2.1  | 1.7  | 1.1  | 0.3  | 0.3  | 5.8            | 2.3   | 0.4    | 0.7   |
| Unidentified<br>SD              | 0.1             | 0.001           | 0.1             | 0.1             | 0.02 | 0.1  | 0.6  | 0.1  | 0.01 | 0.1  | 0.2            | 0.05  | 0.1    | 0.03  |

<sup>a</sup> Uncovered <sup>b</sup> Covered with snow <sup>c</sup> Middle <sup>d</sup> Side <sup>e</sup> Top.

Table S3. Values for Figure 4.

| Bark Pile                         | UC <sup>a</sup> | UC              | UC              | UC              | UC    | UC   | UC    | UC    | UC   | UC   | C <sup>b</sup> | C    | C    | C     |
|-----------------------------------|-----------------|-----------------|-----------------|-----------------|-------|------|-------|-------|------|------|----------------|------|------|-------|
| Storage week                      | 0               | 4M <sup>c</sup> | 4S <sup>d</sup> | 4T <sup>e</sup> | 12M   | 12S  | 12T   | 24M   | 24S  | 24T  | 0              | 24M  | 24S  | 24T   |
| Sugars<br>(mg/g of d.m.)          | 92.3            | 21.1            | 17.9            | 14.8            | 30.9  | 4.8  | 6.5   | 44.5  | 7.8  | 1.7  | 82             | 23.8 | 1.7  | 1.9   |
| Sugars<br>SD                      | 9.5             | 1.9             | 2.3             | 0.9             | 1     | 0.3  | 0.7   | 4.4   | 0.5  | 1    | 10             | 0.2  | 0.2  | 0.04  |
| Sugar alcohols<br>(mg/g of d.m.)  | 8.1             | 22              | 9.3             | 8.6             | 6.5   | 1.6  | 2.7   | 10.3  | 2.2  | 1.1  | 8.1            | 12.7 | 1.1  | 0.9   |
| Sugar alcohols<br>SD              | 0.8             | 1.7             | 1               | 0.1             | 0.1   | 0.02 | 0.3   | 0.2   | 0.02 | 0.5  | 1.8            | 0.5  | 0.1  | 0.04  |
| Organic acids<br>(mg/g of d.m.)   | 23.6            | 15.9            | 10.6            | 7.5             | 16.1  | 2.9  | 3.6   | 25    | 4.2  | 1.3  | 18.8           | 18.6 | 1    | 1.3   |
| Organic acids<br>SD               | 0.5             | 1.6             | 1.4             | 0.2             | 0.1   | 0.1  | 0.6   | 0.7   | 0.1  | 0.7  | 0.3            | 0.2  | 0.02 | 0.1   |
| Stilbenes<br>(mg/g of d.m.)       | 19.4            | 2.7             | 0.7             | 0.7             | 0.5   | 0.4  | 0.4   | 0.3   | 0.2  | 0.2  | 23             | 0.3  | 0.2  | 0.2   |
| Stilbenes<br>SD                   | 3.4             | 0.2             | 0.03            | 0.1             | 0.02  | 0.03 | 0.001 | 0.1   | 0.04 | 0.1  | 0.4            | 0.1  | 0.02 | 0.001 |
| Sesquistilbenes<br>(mg/g of d.m.) | 16.4            | 4.3             | 4.8             | 3.6             | 6.1   | 3.1  | 4.3   | 1.1   | 1.6  | 0.6  | 20.9           | 0    | 0    | 0     |
| Sesquistilbenes<br>SD             | 0.1             | 0.1             | 0.5             | 1.3             | 0.8   | 0.9  | 0.001 | 0.1   | 0.5  | 0.2  | 2.4            | 0    | 0    | 0     |
| Distilbenes<br>(mg/g of d.m.)     | 16.9            | 5.1             | 4.2             | 3.8             | 5.3   | 3.4  | 3.9   | 2.1   | 2.4  | 2.1  | 14.7           | 0    | 0    | 0     |
| Distilbenes<br>SD                 | 0.8             | 0.6             | 0.4             | 0.8             | 0.2   | 0.9  | 0.1   | 0.9   | 1.5  | 0.4  | 2.2            | 0    | 0    | 0     |
| Flavonoids<br>(mg/g of d.m.)      | 6.3             | 2.2             | 0.9             | 0.7             | 0.5   | 0.3  | 0.4   | 0.5   | 0.03 | 0.1  | 5.2            | 1    | 0.1  | 0.1   |
| Flavonoids<br>SD                  | 0.9             | 0.1             | 0.1             | 0.1             | 0.03  | 0.02 | 0.02  | 0.004 | 0.04 | 0.1  | 1.8            | 0.2  | 0.02 | 0.02  |
| Alcohols<br>(mg/g of d.m.)        | 3.5             | 1.2             | 0.5             | 0.5             | 0.6   | 0.1  | 0.2   | 0.5   | 0.04 | 0.02 | 3.4            | 0.8  | 0.1  | 0.05  |
| Alcohols<br>SD                    | 0.5             | 0.1             | 0.04            | 0.05            | 0.002 | 0.01 | 0.01  | 0.1   | 0.1  | 0.03 | 0.5            | 0.1  | 0.01 | 0.01  |
| Others<br>(mg/g of d.m.)          | 6.4             | 8.5             | 4.1             | 3.8             | 4     | 1.8  | 2.8   | 6     | 4    | 0.8  | 6.3            | 8.7  | 2    | 1.9   |
| Others<br>SD                      | 1               | 0.5             | 0.5             | 0.1             | 0.1   | 0.1  | 1.2   | 2.2   | 3.4  | 0.4  | 0.6            | 5.2  | 0.4  | 0.1   |
| Unidentified<br>(mg/g of d.m.)    | 141.5           | 120.1           | 121.1           | 101.6           | 93.3  | 96.5 | 64.2  | 53.1  | 68.6 | 64.7 | 123.8          | 69.4 | 44.1 | 49.7  |
| Unidentified<br>SD                | 21.7            | 3.3             | 13.2            | 13.6            | 5.3   | 3.1  | 6     | 6.6   | 5.2  | 11.8 | 20.3           | 9.5  | 2.2  | 0.4   |

<sup>a</sup> Uncovered <sup>b</sup> Covered with snow <sup>c</sup> Middle <sup>d</sup> Side <sup>e</sup> Top

Table S4. Values for Figure 5.

| Bark Pile                                      | UC <sup>a</sup> | UC              | UC              | UC              | UC    | UC         | UC         | UC         | UC    | UC    | C <sup>b</sup> | C    | C          | C     |
|------------------------------------------------|-----------------|-----------------|-----------------|-----------------|-------|------------|------------|------------|-------|-------|----------------|------|------------|-------|
| Storage week                                   | 0               | 4M <sup>c</sup> | 4S <sup>d</sup> | 4T <sup>e</sup> | 12M   | 12S        | 12T        | 24M        | 24S   | 24T   | 0              | 24M  | 24S        | 24T   |
| Dehydroabietic acid<br>(mg/g of d.m.)          | 2.5             | 2.1             | 2.3             | 2.2             | 2.6   | 2.1        | 2.4        | 2.6        | 2.2   | 2.1   | 2.1            | 2.6  | 2.5        | 2.4   |
| Dehydroabietic acid SD                         | 0.4             | 0.1             | 0.1             | 0.1             | 0.1   | 0.02       | 0.004      | 0.01       | 0.1   | 0.1   | 0.1            | 0.04 | 0.03       | 0.1   |
| Isopimaric acid<br>(mg/g of d.m.)              | 2.1             | 1.6             | 1.7             | 1.7             | 1.4   | 1.5        | 2.3        | 1.6        | 1.5   | 2.7   | 1.9            | 1.6  | 2.7        | 1.7   |
| Isopimaric acid<br>SD                          | 0.3             | 0.1             | 0.05            | 0.03            | 0.02  | 0.01       | 0.02       | 0.002      | 0.03  | 0.1   | 0.1            | 0.1  | 0.1        | 0.02  |
| Levopimaric acid<br>(mg/g of d.m.)             | 1.6             | 1               | 0.3             | 0.3             | 0.2   | 0.2        | 0.2        | 0.2        | 0.2   | 0.1   | 1.3            | 0.2  | 0.2        | 0.2   |
| Levopimaric acid<br>SD                         | 0.2             | 0.03            | 0.01            | 0.02            | 0.005 | 0.001      | 0.01       | 0.002      | 0.01  | 0.01  | 0.01           | 0.03 | 0.01       | 0.02  |
| Neobietic acid<br>(mg/g of d.m.)               | 1.6             | 1.2             | 0.4             | 0.5             | 0.2   | 0.3        | 0.4        | 0.2        | 0.3   | 0.4   | 1.3            | 0.3  | 0.4        | 0.3   |
| Neobietic acid<br>SD                           | 0.3             | 0.1             | 0.01            | 0.01            | 0.01  | 0.000<br>3 | 0.005      | 0.01       | 0.01  | 0.02  | 0.1            | 0.1  | 0.01       | 0.03  |
| Abietic acid<br>(mg/g of d.m.)                 | 1.5             | 1.1             | 1.1             | 1.2             | 1     | 0.8        | 1          | 1.1        | 0.7   | 0.7   | 1.3            | 1.6  | 0.9        | 0.9   |
| Abietic acid<br>SD                             | 0.2             | 0.05            | 0.02            | 0.03            | 0.01  | 0.004      | 0.01       | 0.01       | 0.02  | 0.02  | 0.04           | 0.1  | 0.02       | 0.002 |
| Palustric acid<br>(mg/g of d.m.)               | 1.1             | 1.2             | 0.8             | 0.8             | 0.5   | 0.6        | 0.6        | 0.4        | 0.5   | 0.4   | 0.8            | 0.3  | 0.4        | 0.4   |
| Palustric acid<br>SD                           | 0.2             | 0.1             | 0.01            | 0.01            | 0.01  | 0.005      | 0.000<br>5 | 0.03       | 0.03  | 0.004 | 0.03           | 0.1  | 0.03       | 0.1   |
| Hydroxydehydroabietic acid 1<br>(mg/g of d.m.) | 0.6             | 0.3             | 0.3             | 0.3             | 0.3   | 0.3        | 0.3        | 0.3        | 0.3   | 0.4   | 0.5            | 0.5  | 0.4        | 0.3   |
| Hydroxydehydroabietic acid 1<br>SD             | 0.1             | 0.01            | 0.01            | 0.000<br>2      | 0.01  | 0.001      | 0.003      | 0.01       | 0.003 | 0.01  | 0.01           | 0.01 | 0.01       | 0.02  |
| Sandaracopimaric acid<br>(mg/g of d.m.)        | 0.5             | 0.4             | 0.3             | 0.3             | 0.3   | 0.3        | 0.3        | 0.3        | 0.3   | 0.2   | 0.4            | 0.4  | 0.3        | 0.3   |
| Sandaracopimaric acid<br>SD                    | 0.1             | 0.02            | 0.01            | 0.01            | 0.01  | 0.002      | 0.001      | 0.001      | 0.01  | 0.01  | 0.01           | 0.01 | 0.002      | 0.002 |
| Hydroxy resin acid<br>(mg/g of d.m.)           | 0.5             | 0.1             | 0.1             | 0.1             | 0.1   | 0.1        | 0.1        | 0.2        | 0.1   | 0.1   | 0.6            | 0.2  | 0.1        | 0.1   |
| Hydroxy resin acid SD                          | 0.01            | 0.01            | 0.01            | 0.01            | 0.01  | 0.01       | 0.01       | 0.004      | 0.01  | 0.005 | 0.01           | 0.02 | 0.005      | 0.01  |
| Hydroxydehydroabietic acid 2<br>(mg/g of d.m.) | 0.4             | 0.2             | 0.1             | 0.1             | 0.1   | 0.2        | 0.1        | 0          | 0.2   | 0.1   | 0.4            | 0.2  | 0.1        | 0.1   |
| Hydroxydehydroabietic acid 2<br>SD             | 0.1             | 0.005           | 0.004           | 0.001           | 0.01  | 0.01       | 0.01       | 0.005      | 0.003 | 0.01  | 0.02           | 0.01 | 0.000<br>1 | 0.002 |
| Pimaric acid<br>(mg/g of d.m.)                 | 0.3             | 0.2             | 0.2             | 0.2             | 0.2   | 0.2        | 0.3        | 0.2        | 0.2   | 0.3   | 0.2            | 0.2  | 0.2        | 0.2   |
| Pimaric acid<br>SD                             | 0.03            | 0.01            | 0.003           | 0.01            | 0.004 | 0.000<br>3 | 0.003      | 0.000<br>5 | 0.02  | 0.03  | 0.04           | 0.1  | 0.004      | 0.004 |
| Cupressic acid<br>(mg/g of d.m.)               | 0.2             | 0.1             | 0.2             | 0.2             | 0.2   | 0.1        | 0.2        | 0.2        | 0.1   | 0.1   | 0.2            | 0.2  | 0.1        | 0.2   |
| Cupressic acid<br>SD                           | 0.02            | 0.01            | 0.04            | 0.005           | 0.001 | 0.001      | 0.004      | 0.001      | 0.01  | 0.01  | 0.004          | 0.01 | 0.001      | 0.01  |
| Imbricatolic acid                              | 0.4             | 0.3             | 0.2             | 0.2             | 0.2   | 0.2        | 0.2        | 0.1        | 0.2   | 0.2   | 0.5            | 0.3  | 0.2        | 0.2   |

| (mg/g of d.m.)                             |       |       |       |       |       |            |       |            |       |      |       |       |       |            |  |
|--------------------------------------------|-------|-------|-------|-------|-------|------------|-------|------------|-------|------|-------|-------|-------|------------|--|
| Imbricatolic acid<br>SD                    | 0.04  | 0.01  | 0.01  | 0.01  | 0.004 | 0.02       | 0.002 | 0.000<br>2 | 0.01  | 0.01 | 0.01  | 0.003 | 0.006 | 0.000<br>1 |  |
| 7-Oxodehydroabietic acid<br>(mg/g of d.m.) | 0.2   | 0.1   | 0.1   | 0.1   | 0.2   | 0.1        | 0.1   | 0.2        | 0.1   | 0.2  | 0.2   | 0.2   | 0.2   | 0.2        |  |
| 7-Oxodehydroabietic acid<br>SD             | 0.02  | 0.003 | 0.001 | 0.01  | 0.01  | 0.002      | 0.002 | 0.005      | 0.004 | 0.01 | 0.004 | 0.01  | 0.001 | 0.004      |  |
| Secodehydroabietic acid<br>(mg/g of d.m.)  | 0     | 0     | 0.1   | 0.1   | 0.1   | 0.1        | 0.2   | 0.1        | 0.1   | 0.2  | 0     | 0.1   | 0.2   | 0.1        |  |
| Secodehydroabietic acid<br>SD              | 0.01  | 0.002 | 0.005 | 0.002 | 0.001 | 0.000<br>2 | 0.001 | 0.001      | 0.002 | 0.01 | 0.002 | 0.001 | 0.01  | 0.002      |  |
| 4-Hydroxy cinnamic acid<br>(mg/g of d.m.)  | 0     | 0.1   | 0.3   | 0.3   | 0.3   | 0.2        | 0.4   | 0.5        | 0.3   | 0.5  | 0.1   | 0.4   | 0.5   | 0.4        |  |
| 4-Hydroxy cinnamic acid<br>SD              | 0.004 | 0.01  | 0.01  | 0.01  | 0.003 | 0.01       | 0.005 | 0.01       | 0.002 | 0.01 | 0.002 | 0.02  | 0.01  | 0.01       |  |
| Other resin acids<br>(mg/g of d.m.)        | 0.5   | 0.2   | 0.2   | 0.2   | 0.3   | 0.2        | 0.2   | 0.2        | 0.2   | 0.2  | 0.3   | 0.4   | 0.3   | 0.2        |  |
| Other resin acids<br>SD                    | 0.1   | 0.02  | 0.005 | 0.03  | 0.03  | 0.03       | 0.001 | 0.02       | 0.005 | 0.01 | 0.01  | 0.01  | 0.01  | 0.01       |  |

<sup>a</sup> Uncovered <sup>b</sup> Covered with snow <sup>c</sup> Middle <sup>d</sup> Side <sup>e</sup> Top.

Table S5. Values for Figure 6.

| Bark Pile                          | UC <sup>a</sup> | UC              | UC              | UC              | UC    | UC      | UC     | UC    | UC    | UC    | C <sup>b</sup> | C    | C      | C      |
|------------------------------------|-----------------|-----------------|-----------------|-----------------|-------|---------|--------|-------|-------|-------|----------------|------|--------|--------|
| Storage week                       | 0               | 4M <sup>c</sup> | 4S <sup>d</sup> | 4T <sup>e</sup> | 12M   | 12S     | 12T    | 24M   | 24S   | 24T   | 0              | 24M  | 24S    | 24T    |
| Acid 18:2 esters<br>(mg/g of d.m.) | 2.7             | 2.2             | 1.8             | 1.6             | 1.6   | 0.8     | 0.8    | 1.5   | 0.4   | 0.3   | 2.8            | 1.7  | 0.5    | 0.8    |
| Acid 18:2 esters<br>SD             | 0.05            | 0.1             | 0.1             | 0.1             | 0.02  | 0.01    | 0.002  | 0.1   | 0.01  | 0.03  | 0.005          | 0.02 | 0.01   | 0.1    |
| Acid 18:1 esters<br>(mg/g of d.m.) | 2               | 1.8             | 1.4             | 1.3             | 1.6   | 0.7     | 0.6    | 1     | 0.2   | 0.2   | 2.1            | 1.1  | 0.3    | 0.4    |
| Acid 18:1 esters<br>SD             | 0.1             | 0.1             | 0.1             | 0.1             | 0.01  | 0.01    | 0.01   | 0.1   | 0.01  | 0.02  | 0.02           | 0.04 | 0.02   | 0.1    |
| Acid 18:3 esters<br>(mg/g of d.m.) | 1.6             | 1.1             | 0.9             | 0.8             | 0.8   | 0.3     | 0.4    | 0.7   | 0.2   | 0.3   | 1.7            | 1.1  | 0.3    | 0.5    |
| Acid 18:3 esters<br>SD             | 0.01            | 0.1             | 0.1             | 0.03            | 0.02  | 0.003   | 0.03   | 0.1   | 0.1   | 0.04  | 0.01           | 0.02 | 0.03   | 0.04   |
| Acid 22:0 esters<br>(mg/g of d.m.) | 0.8             | 0.2             | 0.2             | 0.2             | 0.2   | 0.2     | 0.2    | 0.5   | 0.3   | 0.2   | 0.9            | 0.6  | 0.2    | 0.6    |
| Acid 22:0 esters<br>SD             | 0.01            | 0.01            | 0.02            | 0.02            | 0.02  | 0.002   | 0.02   | 0.01  | 0.03  | 0.04  | 0.1            | 0.01 | 0.02   | 0.3    |
| Acid 16:0 esters<br>(mg/g of d.m.) | 0.4             | 0.4             | 0.3             | 0.3             | 0.4   | 0.2     | 0.2    | 0.3   | 0.1   | 0.1   | 0.4            | 0.3  | 0.1    | 0.1    |
| Acid 16:0 esters<br>SD             | 0.04            | 0.02            | 0.02            | 0.02            | 0.004 | 0.001   | 0.002  | 0.03  | 0.002 | 0.01  | 0.01           | 0.01 | 0.01   | 0.02   |
| Acid 18:1<br>(mg/g of d.m.)        | 0.3             | 0.4             | 0.6             | 0.7             | 0.7   | 0.5     | 0.6    | 0.7   | 0.3   | 0.2   | 0.2            | 0.6  | 0.4    | 0.9    |
| Acid 18:1<br>SD                    | 0.1             | 0.02            | 0.04            | 0.03            | 0.01  | 0.01    | 0.02   | 0.01  | 0.002 | 0.01  | 0.02           | 0.02 | 0.01   | 0.01   |
| Acid 22:0<br>(mg/g of d.m.)        | 0.3             | 0.2             | 0.2             | 0.3             | 0.4   | 0.2     | 0.3    | 0.4   | 0.2   | 0.2   | 0.3            | 0.4  | 0.2    | 0.2    |
| Acid 22:0<br>SD                    | 0.001           | 0.003           | 0.004           | 0.02            | 0.01  | 0.001   | 0.02   | 0.01  | 0.002 | 0.01  | 0.004          | 0.01 | 0.02   | 0.0001 |
| Acid 18:3<br>(mg/g of d.m.)        | 0.3             | 0.5             | 0.5             | 0.5             | 0.6   | 0.3     | 0.4    | 0.6   | 0.3   | 0.1   | 0.3            | 0.6  | 0.3    | 0.6    |
| Acid 18:3<br>SD                    | 0.01            | 0.01            | 0.02            | 0.002           | 0.002 | 0.01    | 0.03   | 0.01  | 0.05  | 0.001 | 0.01           | 0.02 | 0.02   | 0.01   |
| Acid 17:0 esters<br>(mg/g of d.m.) | 0.3             | 0.2             | 0.2             | 0.2             | 0.2   | 0.1     | 0.1    | 0.1   | 0.03  | 0.04  | 0.3            | 0.1  | 0      | 0      |
| Acid 17:0 esters<br>SD             | 0.004           | 0.01            | 0.01            | 0.01            | 0.001 | 0.001   | 0.002  | 0.02  | 0.002 | 0.005 | 0.003          | 0.01 | 0.0001 | 0.01   |
| Acid 18:0<br>(mg/g of d.m.)        | 0.2             | 0.1             | 0.1             | 0.1             | 0.2   | 0.1     | 0.1    | 0.2   | 0.1   | 0.1   | 0.1            | 0.2  | 0.2    | 0.2    |
| Acid 18:0<br>SD                    | 0.003           | 0.01            | 0.01            | 0.004           | 0.002 | 0.00004 | 0.0003 | 0.003 | 0.003 | 0.004 | 0.01           | 0.01 | 0.004  | 0.003  |
| Acid 18:2<br>(mg/g of d.m.)        | 0.1             | 0.3             | 0.4             | 0.5             | 0.7   | 0.3     | 0.4    | 0.8   | 0.2   | 0.2   | 0.2            | 0.7  | 0.3    | 0.8    |
| Acid 18:2<br>SD                    | 0.004           | 0.001           | 0.005           | 0.0002          | 0.012 | 0.001   | 0.02   | 0.02  | 0.003 | 0.003 | 0.0002         | 0.02 | 0.01   | 0.002  |
| Acid 24:0 esters<br>(mg/g of d.m.) | 0.1             | 0.1             | 0.2             | 0.2             | 0.3   | 0.2     | 0.3    | 0.6   | 0.2   | 0.1   | 0              | 0.5  | 0.1    | 0.6    |
| Acid 24:0 esters                   | 0.02            | 0.03            | 0.003           | 0.01            | 0.02  | 0.001   | 0.02   | 0.02  | 0.001 | 0.02  | 0              | 0.02 | 0.01   | 0.4    |

| SD                                    |       |       |       |       |       |             |        |       |       |       |       |       |        |       |     |
|---------------------------------------|-------|-------|-------|-------|-------|-------------|--------|-------|-------|-------|-------|-------|--------|-------|-----|
| Acid 24:0<br>(mg/g of d.m.)           | 0.2   | 0.1   | 0.1   | 0.1   | 0.1   | 0.1         | 0.1    | 0.1   | 0.1   | 0.1   | 0.1   | 0.3   | 0.2    | 0.1   | 0.1 |
| Acid 24:0<br>SD                       | 0.037 | 0.004 | 0.002 | 0.03  | 0.01  | 0.002       | 0.0001 | 0.005 | 0.001 | 0.01  | 0.01  | 0.002 | 0.005  | 0.004 |     |
| Acid 16:0<br>(mg/g of d.m.)           | 0.1   | 0.1   | 0.2   | 0.2   | 0.3   | 0.1         | 0.2    | 0.3   | 0.1   | 0.1   | 0.1   | 0.3   | 0.1    | 0.3   |     |
| Acid 16:0<br>SD                       | 0.002 | 0.01  | 0.01  | 0.001 | 0.005 | 0.002       | 0.005  | 0.01  | 0.001 | 0.003 | 0.001 | 0.01  | 0.002  | 0.001 |     |
| Acid 17:0<br>(mg/g of d.m.)           | 0.04  | 0.1   | 0.1   | 0.1   | 0.1   | 0.1         | 0.1    | 0.1   | 0.05  | 0.03  | 0.04  | 0.1   | 0.1    | 0.2   |     |
| Acid 17:0<br>SD                       | 0.02  | 0.01  | 0.1   | 0.1   | 0.01  | 0.01        | 0.05   | 0.1   | 0.03  | 0.02  | 0.02  | 0.04  | 0.03   | 0.1   |     |
| 2-Hydroxy-24:0 acid<br>(mg/g of d.m.) | 0.1   | 0.1   | 0.2   | 0.2   | 0.3   | 0.1         | 0.2    | 0.4   | 0.1   | 0.1   | 0.1   | 0.3   | 0.1    | 0.2   |     |
| 2-Hydroxy-24:0 acid<br>SD             | 0.1   | 0     | 0.03  | 0.04  | 0.01  | 0.003       | 0.03   | 0.01  | 0.01  | 0.002 | 0.005 | 0.01  | 0.001  | 0.001 |     |
| Other fatty acids<br>(mg/g of d.m.)   | 0.1   | 0.03  | 0.04  | 0.02  | 0.03  | 0.02        | 0.02   | 0.1   | 0.02  | 0.04  | 0.1   | 0.1   | 0.03   | 0.04  |     |
| Other fatty acids<br>SD               | 0.02  | 0.01  | 0.04  | 0.002 | 0.02  | 0.0000<br>3 | 0.0002 | 0.004 | 0.01  | 0.03  | 0.02  | 0.001 | 0.0001 | 0.002 |     |

<sup>a</sup> Uncovered <sup>b</sup> Covered with snow <sup>c</sup> Middle <sup>d</sup> Side <sup>e</sup> Top

Table S6. Values for Figure 7.

| Bark Pile                                                  | UC <sup>a</sup> | UC              | UC              | UC              | UC    | UC         | UC         | UC         | UC         | UC    | UC         | C <sup>b</sup> | C           | C          | C   |
|------------------------------------------------------------|-----------------|-----------------|-----------------|-----------------|-------|------------|------------|------------|------------|-------|------------|----------------|-------------|------------|-----|
| Storage week                                               | 0               | 4M <sup>c</sup> | 4S <sup>d</sup> | 4T <sup>e</sup> | 12M   | 12S        | 12T        | 24M        | 24S        | 24T   | 0          | 24M            | 24S         | 24T        |     |
| Thunbergol<br>(mg/g of d.m.)                               | 1.3             | 1.0             | 0.3             | 0.3             | 0.1   | 0.3        | 0.2        | 0.1        | 0.3        | 0.2   | 1.2        | 0.3            | 0.2         | 0.3        |     |
| Thunbergol<br>SD                                           | 0.2             | 0.1             | 0.001           | 0.003           | 0.01  | 0.03       | 0.000<br>3 | 0.01       | 0.02       | 0.004 | 0.03       | 0.02           | 0.003       | 0.01       |     |
| $\Delta$ -13-( <i>trans</i> ) neoabienol<br>(mg/g of d.m.) | 1.3             | 1.0             | 0.8             | 0.8             | 0.5   | 0.6        | 0.6        | 0.5        | 0.6        | 0.5   | 1.1        | 0.8            | 0.6         | 0.6        |     |
| $\Delta$ -13-( <i>trans</i> ) neoabienol<br>SD             | 0.2             | 0.04            | 0.02            | 0.005           | 0.02  | 0.01       | 0.01       | 0.01       | 0.02       | 0.01  | 0.01       | 0.01           | 0.002       | 0.000<br>4 |     |
| <i>Cis</i> -abienol<br>(mg/g of d.m.)                      | 0.4             | 0.2             | 0.1             | 0.2             | 0.1   | 0.1        | 0.1        | 0.1        | 0.1        | 0.2   | 0.4        | 0.2            | 0.1         | 0.2        |     |
| <i>Cis</i> -abienol<br>SD                                  | 0.04            | 0.01            | 0.004           | 0.01            | 0.004 | 0.01       | 0.01       | 0.003      | 0.001      | 0.01  | 0.02       | 0.01           | 0.001       | 0.001      |     |
| Isopimaral<br>(mg/g of d.m.)                               | 0.2             | 0.1             | 0.1             | 0.1             | 0.1   | 0.1        | 0.1        | 0.2        | 0.2        | 0.2   | 0.2        | 0.2            | 0.2         | 0.1        |     |
| Isopimaral<br>SD                                           | 0.1             | 0.01            | 0.004           | 0.01            | 0.002 | 0.01       | 0.01       | 0.003      | 0.05       | 0.01  | 0.001      | 0.02           | 0.01        | 0.01       |     |
| Palustral<br>(mg/g of d.m.)                                | 0.2             | 0.2             | 0.2             | 0.2             | 0.1   | 0.1        | 0.2        | 0.1        | 0.1        | 0.2   | 0.1        | 0.1            | 0.2         | 0.1        |     |
| Plaustral<br>SD                                            | 0.02            | 0.01            | 0.003           | 0.01            | 0.003 | 0.000<br>2 | 0.001      | 0.004      | 0.01       | 0.004 | 0.01       | 0.01           | 0.01        | 0.01       |     |
| Isopimarol<br>(mg/g of d.m.)                               | 0.1             | 0.1             | 0.1             | 0.1             | 0.1   | 0.1        | 0.1        | 0.1        | 0.1        | 0.1   | 0.1        | 0.1            | 0.1         | 0.1        |     |
| Isopimarol<br>SD                                           | 0.1             | 0.01            | 0.004           | 0.01            | 0.002 | 0.01       | 0.01       | 0.003      | 0.05       | 0.01  | 0.001      | 0.02           | 0.01        | 0.01       |     |
| Dehydroabietal<br>(mg/g of d.m.)                           | 0.1             | 0.1             | 0.1             | 0.1             | 0.1   | 0.1        | 0.1        | 0.1        | 0.1        | 0.1   | 0.1        | 0.1            | 0.1         | 0.1        |     |
| Dehydroabietal<br>SD                                       | 0.02            | 0.01            | 0.005           | 0.004           | 0.003 | 0.001      | 0.000<br>4 | 0.001      | 0.003      | 0.001 | 0.01       | 0.003          | 0.000<br>02 | 0.001      |     |
| Pimaradiene<br>(mg/g of d.m.)                              | 0.1             | 0.1             | 0.1             | 0.1             | 0.1   | 0.1        | 0.1        | 0.1        | 0.1        | 0.1   | 0.1        | 0.1            | 0.1         | 0.1        |     |
| Pimaradiene<br>SD                                          | 0.02            | 0.01            | 0.003           | 0.004           | 0.004 | 0.002      | 0.001      | 0.002      | 0.000<br>2 | 0.003 | 0.002      | 0.001          | 0.002       | 0.000<br>2 |     |
| Manool<br>(mg/g of d.m.)                                   | 0.1             | 0.1             | 0.1             | 0.1             | 0.1   | 0.1        | 0.1        | 0.1        | 0.1        | 0.1   | 0.1        | 0.1            | 0.1         | 0.2        | 0.1 |
| Manool<br>SD                                               | 0.02            | 0.02            | 0.005           | 0.01            | 0.003 | 0.001      | 0.003      | 0.001      | 0.001      | 0.01  | 0.001      | 0.001          | 0.001       | 0.001      |     |
| Epimanoil oxide<br>(mg/g of d.m.)                          | 0.1             | 0.1             | 0.1             | 0.1             | 0.1   | 0.1        | 0.1        | 0.2        | 0.1        | 0.1   | 0.1        | 0.1            | 0.1         | 0.1        |     |
| Epimanoil oxide<br>SD                                      | 0.01            | 0.01            | 0.01            | 0.000<br>3      | 0.001 | 0.001      | 0.002      | 0.001      | 0.001      | 0.003 | 0.000<br>2 | 0.02           | 0.001       | 0.001      |     |
| Abietal<br>(mg/g of d.m.)                                  | 0.04            | 0.03            | 0.03            | 0.03            | 0.03  | 0.01       | 0.03       | 0.04       | 0.02       | 0.00  | 0.04       | 0.05           | 0.03        | 0.02       |     |
| Abietal<br>SD                                              | 0.003           | 0.002           | 0.002           | 0.000<br>2      | 0.001 | 0.01       | 0.001      | 0.000<br>1 | 0.002      | 0.0   | 0.001      | 0.003          | 0.000<br>02 | 0.001      |     |
| Thunbergene<br>(mg/g of d.m.)                              | 0.05            | 0.04            | 0.04            | 0.04            | 0.05  | 0.04       | 0.04       | 0.04       | 0.04       | 0.04  | 0.1        | 0.1            | 0.03        | 0.05       |     |
| Thunbergene                                                | 0.01            | 0.01            | 0.002           | 0.01            | 0.003 | 0.001      | 0.001      | 0.002      | 0.01       | 0.004 | 0.01       | 0.001          | 0.01        | 0.003      |     |



| SD                                                  |       |       |       |            |       |       |            |            |       |       |       |       |             |       |
|-----------------------------------------------------|-------|-------|-------|------------|-------|-------|------------|------------|-------|-------|-------|-------|-------------|-------|
| Methyl-8,15-isopimaradien-18-oate<br>(mg/g of d.m.) | 0.1   | 0.0   | 0.1   | 0.1        | 0.1   | 0.2   | 0.4        | 0.1        | 0.2   | 0.7   | 0.04  | 0.04  | 0.6         | 0.2   |
| Methyl-8,15-isopimaradien-18-oate<br>SD             | 0.003 | 0.002 | 0.002 | 0.000<br>2 | 0.001 | 0.01  | 0.001      | 0.000<br>1 | 0.002 | 0.0   | 0.001 | 0.003 | 0.000<br>02 | 0.001 |
| Methyl neoabietate<br>(mg/g of d.m.)                | 0.03  | 0.02  | 0.03  | 0.03       | 0.01  | 0.02  | 0.02       | 0.01       | 0.00  | 0.02  | 0.02  | 0.00  | 0.02        | 0.01  |
| Methyl neoabietate<br>SD                            | 0.01  | 0.001 | 0.003 | 0.001      | 0.01  | 0.001 | 0.000<br>3 | 0.000<br>3 | 0.0   | 0.000 | 0.003 | 0.0   | 0.000<br>1  | 0.003 |
| Vanillin<br>(mg/g of d.m.)                          | 0.01  | 0.04  | 0.03  | 0.1        | 0.05  | 0.03  | 0.04       | 0.1        | 0.04  | 0.05  | 0.05  | 0.1   | 0.1         | 0.03  |
| Vanillin<br>SD                                      | 0.01  | 0.02  | 0.01  | 0.002      | 0.005 | 0.003 | 0.002      | 0.01       | 0.002 | 0.003 | 0.01  | 0.004 | 0.003       | 0.002 |

<sup>a</sup> Uncovered <sup>b</sup> Covered with snow <sup>c</sup> Middle <sup>d</sup> Side <sup>e</sup> Top

Table S7. Values for Figure 8.

| Bark Pile                                      | UC <sup>a</sup> | UC              | UC              | UC              | UC    | UC      | UC    | UC     | UC    | UC    | C <sup>b</sup> | C     | C     | C     |
|------------------------------------------------|-----------------|-----------------|-----------------|-----------------|-------|---------|-------|--------|-------|-------|----------------|-------|-------|-------|
| Storage week                                   | 0               | 4M <sup>c</sup> | 4S <sup>d</sup> | 4T <sup>e</sup> | 12M   | 12S     | 12T   | 24M    | 24S   | 24T   | 0              | 24M   | 24S   | 24T   |
| Sitosterol esters<br>(mg/g of d.m.)            | 1.8             | 1.6             | 1.4             | 1.3             | 1.0   | 1.0     | 0.9   | 0.8    | 0.4   | 0.2   | 0.9            | 0.9   | 0.7   | 0.8   |
| Sitosterol esters<br>SD                        | 0.1             | 0.04            | 0.2             | 0.1             | 0.02  | 0.04    | 0.01  | 0.02   | 0.1   | 0.02  | 0.1            | 0.01  | 0.04  | 0.02  |
| Other sterol esters<br>(mg/g of d.m.)          | 0.7             | 1.7             | 0.9             | 0.7             | 1.2   | 1.2     | 1.2   | 1.1    | 0.8   | 0.7   | 1.6            | 1.0   | 0.5   | 0.8   |
| Other sterol esters<br>SD                      | 0.1             | 0.1             | 0.003           | 0.1             | 0.2   | 0.3     | 0.03  | 0.2    | 0.02  | 0.03  | 0.1            | 0.1   | 0.04  | 0.1   |
| Campesterol esters<br>(mg/g of d.m.)           | 0.4             | 0.3             | 0.3             | 0.3             | 0.2   | 0.2     | 0.2   | 0.2    | 0.1   | 0.0   | 0.2            | 0.2   | 0.1   | 0.2   |
| Campesterol esters<br>SD                       | 0.02            | 0.01            | 0.04            | 0.02            | 0.02  | 0.01    | 0.01  | 0.02   | 0.02  | 0.01  | 0.02           | 0.001 | 0.01  | 0.1   |
| Sitosterol<br>(mg/g of d.m.)                   | 0.3             | 0.4             | 0.4             | 0.4             | 0.5   | 0.6     | 0.5   | 0.5    | 0.7   | 0.8   | 0.4            | 0.5   | 0.6   | 0.6   |
| Sitosterol<br>SD                               | 0.02            | 0.02            | 0.02            | 0.03            | 0.03  | 0.002   | 0.01  | 0.02   | 0.003 | 0.01  | 0.01           | 0.01  | 0.001 | 0.002 |
| Campesterol<br>(mg/g of d.m.)                  | 0.1             | 0.1             | 0.1             | 0.1             | 0.1   | 0.1     | 0.1   | 0.1    | 0.1   | 0.2   | 0.1            | 0.1   | 0.1   | 0.1   |
| Campesterol<br>SD                              | 0.005           | 0.003           | 0.001           | 0.004           | 0.02  | 0.001   | 0.003 | 0.003  | 0.002 | 0.001 | 0.001          | 0.01  | 0.002 | 0.01  |
| 24-Methylenecycloartan-3-one<br>(mg/g of d.m.) | 0.04            | 0.04            | 0.05            | 0.1             | 0.1   | 0.1     | 0.1   | 0.0    | 0.1   | 0.1   | 0.04           | 0.1   | 0.1   | 0.1   |
| 24-Methylenecycloartan-3-one<br>SD             | 0.001           | 0.01            | 0.0004          | 0.001           | 0.001 | 0.002   | 0.003 | 0.003  | 0.002 | 0.002 | 0.0001         | 0.003 | 0.003 | 0.001 |
| 7-Hydroxysitosterol<br>(mg/g of d.m.)          | 0.02            | 0.1             | 0.02            | 0.03            | 0.1   | 0.2     | 0.1   | 0.1    | 0.2   | 0.3   | 0.1            | 0.1   | 0.2   | 0.1   |
| 7-Hydroxysitosterol<br>SD                      | 0.005           | 0.001           | 0.0002          | 0.005           | 0.04  | 0.00004 | 0.03  | 0.0004 | 0.03  | 0.003 | 0.001          | 0.01  | 0.01  | 0.04  |
| Chondrillasterol<br>(mg/g of d.m.)             | 0.0             | 0.01            | 0.02            | 0.02            | 0.1   | 0.1     | 0.1   | 0.1    | 0.3   | 0.3   | 0.02           | 0.1   | 0.2   | 0.1   |
| Chondrillasterol<br>SD                         | 0.0             | 0.01            | 0.004           | 0.01            | 0.03  | 0.01    | 0.02  | 0.02   | 0.01  | 0.003 | 0.003          | 0.001 | 0.004 | 0.01  |
| Ergosterol<br>(mg/g of d.m.)                   | 0.02            | 0.02            | 0.02            | 0.01            | 0.03  | 0.04    | 0.03  | 0.01   | 0.04  | 0.03  | 0.02           | 0.02  | 0.02  | 0.01  |
| Ergosterol<br>SD                               | 0.02            | 0.001           | 0.004           | 0.001           | 0.02  | 0.0001  | 0.01  | 0.001  | 0.002 | 0.002 | 0.0003         | 0.002 | 0.01  | 0.02  |

<sup>a</sup> Uncovered <sup>b</sup> Covered with snow <sup>c</sup> Middle <sup>d</sup> Side <sup>e</sup> Top

Table S8. Values for Figure 9.

| Bark Pile                           | UC <sup>a</sup> | UC              | UC              | UC              | UC     | UC    | UC    | UC    | UC   | UC   | C <sup>b</sup> | C    | C     | C      |
|-------------------------------------|-----------------|-----------------|-----------------|-----------------|--------|-------|-------|-------|------|------|----------------|------|-------|--------|
| Storage week                        | 0               | 4M <sup>c</sup> | 4S <sup>d</sup> | 4T <sup>e</sup> | 12M    | 12S   | 12T   | 24M   | 24S  | 24T  | 0              | 24M  | 24S   | 24T    |
| Glucose<br>(mg/g of d.m.)           | 51.1            | 12.0            | 9.6             | 7.0             | 16.6   | 1.6   | 2.3   | 20.2  | 3.9  | 0.3  | 43.8           | 1.3  | 0.1   | 0.1    |
| Glucose<br>SD                       | 3.2             | 1.2             | 1.4             | 0.8             | 0.4    | 0.2   | 0.3   | 1.5   | 0.01 | 0.1  | 3.2            | 0.3  | 0.01  | 0.01   |
| Sucrose<br>(mg/g of d.m.)           | 27.3            | 1.1             | 0.8             | 2.1             | 0.8    | 0.2   | 0.1   | 1.1   | 0.2  | 0.1  | 27.8           | 0.3  | 0.2   | 0.2    |
| Sucrose<br>SD                       | 4.0             | 0.2             | 0.02            | 0.1             | 0.4    | 0.01  | 0.05  | 0.1   | 0.1  | 0.1  | 4.0            | 0.1  | 0.02  | 0.01   |
| Maltose<br>(mg/g of d.m.)           | 5.2             | 1.8             | 0.7             | 0.7             | 0.9    | 0.5   | 0.6   | 1.1   | 0.5  | 0.4  | 4.5            | 1.0  | 0.5   | 0.5    |
| Maltose<br>SD                       | 0.6             | 0.2             | 0.1             | 0.02            | 0.1    | 0.01  | 0.01  | 0.3   | 0.05 | 0.2  | 0.6            | 0.2  | 0.1   | 0.004  |
| Alpha lactose<br>(mg/g of d.m.)     | 2.7             | 0.7             | 0.6             | 0.3             | 0.2    | 0.1   | 0.05  | 0.1   | 0.1  | 0.03 | 2.4            | 0.1  | 0.05  | 0.04   |
| Alpha lactose<br>SD                 | 0.4             | 0.1             | 0.1             | 0.003           | 0.0002 | 0.03  | 0.01  | 0.1   | 0.1  | 0.04 | 0.3            | 0.02 | 0.01  | 0.001  |
| Galactose<br>(mg/g of d.m.)         | 2.0             | 1.9             | 2.5             | 2.7             | 10.3   | 1.7   | 2.7   | 19.1  | 2.4  | 0.5  | 1.2            | 17.0 | 0.5   | 0.6    |
| Galactose<br>SD                     | 0.6             | 0.2             | 0.3             | 0.1             | 0.2    | 0.1   | 0.4   | 2.2   | 0.2  | 0.3  | 0.4            | 0.7  | 0.03  | 0.01   |
| Trehalose<br>(mg/g of d.m.)         | 1.6             | 0.6             | 0.8             | 0.6             | 0.3    | 0.2   | 0.1   | 0.2   | 0.3  | 0.1  | 1.1            | 0.2  | 0.2   | 0.1    |
| Trehalose<br>SD                     | 0.3             | 0.02            | 0.1             | 0.01            | 0.03   | 0.01  | 0.002 | 0.1   | 0.1  | 0.2  | 0.1            | 0.1  | 0.03  | 0.001  |
| Palatinose<br>(mg/g of d.m.)        | 1.1             | 0.2             | 0.1             | 0.1             | 0.0    | 0.0   | 0.0   | 0.0   | 0.0  | 0.0  | 0.7            | 0.0  | 0.0   | 0.0    |
| Palatinose<br>SD                    | 0.1             | 0.01            | 0.01            | 0.001           | 0.0    | 0.0   | 0.0   | 0.0   | 0.0  | 0.0  | 0.1            | 0.0  | 0.0   | 0.0    |
| Cellobiose<br>(mg/g of d.m.)        | 0.7             | 0.1             | 0.1             | 0.1             | 0.2    | 0.1   | 0.0   | 0.2   | 0.04 | 0.03 | 0.4            | 0.1  | 0.03  | 0.04   |
| Cellobiose<br>SD                    | 0.3             | 0.002           | 0.03            | 0.0001          | 0.003  | 0.004 | 0.0   | 0.03  | 0.1  | 0.04 | 0.01           | 0.02 | 0.004 | 0.0005 |
| Lactulose<br>(mg/g of d.m.)         | 0.4             | 0.3             | 0.2             | 0.1             | 0.1    | 0.1   | 0.1   | 0.1   | 0.1  | 0.0  | 0.4            | 0.1  | 0.01  | 0.0    |
| Lactulose<br>SD                     | 0.1             | 0.02            | 0.003           | 0.003           | 0.01   | 0.01  | 0.01  | 0.01  | 0.01 | 0.0  | 0.1            | 0.01 | 0.001 | 0.0    |
| Glucose phosphate<br>(mg/g of d.m.) | 0.2             | 0.6             | 0.5             | 0.1             | 0.2    | 0.1   | 0.1   | 0.2   | 0.02 | 0.1  | 0.5            | 0.4  | 0.1   | 0.1    |
| Glucose phosphate<br>SD             | 0.3             | 0.1             | 0.1             | 0.01            | 0.002  | 0.01  | 0.01  | 0.002 | 0.04 | 0.01 | 0.04           | 0.1  | 0.004 | 0.003  |
| Mannose<br>(mg/g of d.m.)           | 0.0             | 1.8             | 2.1             | 1.0             | 1.5    | 0.4   | 0.5   | 2.3   | 0.4  | 0.1  | 0.0            | 3.4  | 0.1   | 0.1    |
| Mannose<br>SD                       | 0.0             | 0.2             | 0.3             | 0.05            | 0.03   | 0.01  | 0.1   | 0.2   | 0.02 | 0.02 | 0.0            | 0.1  | 0.04  | 0.01   |

<sup>a</sup> Uncovered <sup>b</sup> Covered with snow <sup>c</sup> Middle <sup>d</sup> Side <sup>e</sup> Top

Table S9. Values for Figure 10.

| Bark Pile                      | UC <sup>a</sup> | UC              | UC              | UC              | UC     | UC    | UC    | UC   | UC    | UC    | C <sup>b</sup> | C    | C     | C     |
|--------------------------------|-----------------|-----------------|-----------------|-----------------|--------|-------|-------|------|-------|-------|----------------|------|-------|-------|
| Storage week                   | 0               | 4M <sup>c</sup> | 4S <sup>d</sup> | 4T <sup>e</sup> | 12M    | 12S   | 12T   | 24M  | 24S   | 24T   | 0              | 24M  | 24S   | 24T   |
| Pinitol<br>(mg/g of d.m.)      | 5.0             | 4.8             | 1.9             | 1.6             | 2.0    | 0.4   | 0.7   | 3.4  | 0.4   | 0.1   | 4.8            | 4.6  | 0.2   | 0.1   |
| Pinitol<br>SD                  | 0.8             | 0.4             | 0.2             | 0.03            | 0.05   | 0.01  | 0.02  | 0.2  | 0.02  | 0.03  | 0.7            | 0.01 | 0.03  | 0.01  |
| Maltotriitol<br>(mg/g of d.m.) | 1.0             | 0.1             | 0.1             | 0.1             | 0.1    | 0.1   | 0.1   | 0.1  | 0.0   | 0.0   | 1.3            | 0.2  | 0.2   | 0.1   |
| Maltotriitol<br>SD             | 0.04            | 0.002           | 0.01            | 0.001           | 0.02   | 0.002 | 0.003 | 0.1  | 0.0   | 0.0   | 0.4            | 0.04 | 0.01  | 0.004 |
| Inositol<br>(mg/g of d.m.)     | 0.6             | 6.0             | 1.9             | 1.2             | 0.4    | 0.1   | 0.1   | 0.6  | 0.1   | 0.05  | 0.5            | 0.5  | 0.02  | 0.02  |
| Inositol<br>SD                 | 0.02            | 0.4             | 0.02            | 0.1             | 0.0001 | 0.004 | 0.005 | 0.03 | 0.001 | 0.002 | 0.1            | 0.02 | 0.001 | 0.001 |
| Sorbitol<br>(mg/g of d.m.)     | 0.4             | 1.4             | 0.4             | 0.5             | 0.5    | 0.1   | 0.2   | 0.7  | 0.2   | 0.1   | 0.4            | 1.2  | 0.1   | 0.04  |
| Sorbitol<br>SD                 | 0.03            | 0.1             | 0.1             | 0.01            | 0.03   | 0.003 | 0.004 | 0.02 | 0.02  | 0.02  | 0.1            | 0.1  | 0.001 | 0.003 |
| Arabitol<br>(mg/g of d.m.)     | 0.4             | 1.9             | 0.8             | 0.7             | 1.4    | 0.2   | 0.4   | 2.3  | 0.5   | 0.3   | 0.7            | 1.6  | 0.3   | 0.2   |
| Arabitol<br>SD                 | 0.02            | 0.2             | 0.1             | 0.03            | 0.002  | 0.02  | 0.1   | 0.1  | 0.1   | 0.1   | 0.5            | 0.01 | 0.003 | 0.01  |
| Isomaltitol<br>(mg/g of d.m.)  | 0.3             | 0.1             | 0.1             | 0.0             | 0.0    | 0.0   | 0.1   | 0.1  | 0.0   | 0.1   | 0.3            | 0.1  | 0.1   | 0.1   |
| Isomaltitol<br>SD              | 0.04            | 0.0001          | 0.004           | 0.0             | 0.0    | 0.0   | 0.02  | 0.01 | 0.0   | 0.02  | 0.1            | 0.2  | 0.01  | 0.01  |
| Mannitol<br>(mg/g of d.m.)     | 0.3             | 6.6             | 3.1             | 3.5             | 1.0    | 0.4   | 0.5   | 1.5  | 0.5   | 0.2   | 0.2            | 2.6  | 0.05  | 0.03  |
| Mannitol<br>SD                 | 0.03            | 0.6             | 0.5             | 0.2             | 0.02   | 0.01  | 0.002 | 0.1  | 0.03  | 0.1   | 0.02           | 0.2  | 0.01  | 0.001 |
| L-Ribulose<br>(mg/g of d.m.)   | 0.1             | 0.7             | 0.6             | 0.5             | 0.6    | 0.2   | 0.3   | 1.0  | 0.3   | 0.3   | 0.0            | 1.5  | 0.2   | 0.2   |
| L-Ribulose<br>SD               | 0.1             | 0.1             | 0.1             | 0.01            | 0.01   | 0.005 | 0.04  | 0.02 | 0.02  | 0.2   | 0.0            | 0.05 | 0.002 | 0.02  |
| Erythritol<br>(mg/g of d.m.)   | 0.0             | 0.2             | 0.4             | 0.4             | 0.5    | 0.2   | 0.3   | 0.7  | 0.3   | 0.0   | 0.0            | 0.6  | 0.03  | 0.04  |
| Erythritol<br>SD               | 0.0             | 0.02            | 0.1             | 0.1             | 0.1    | 0.01  | 0.1   | 0.2  | 0.1   | 0.0   | 0.0            | 0.3  | 0.001 | 0.006 |
| Maltitol<br>(mg/g of d.m.)     | 0.0             | 0.0             | 0.0             | 0.0             | 0.0    | 0.0   | 0.0   | 0.0  | 0.0   | 0.0   | 0.0            | 0.04 | 0.01  | 0.02  |
| Maltitol<br>SD                 | 0.0             | 0.0             | 0.0             | 0.0             | 0.0    | 0.0   | 0.0   | 0.0  | 0.0   | 0.0   | 0.0            | 0.02 | 0.001 | 0.02  |

<sup>a</sup> Uncovered <sup>b</sup> Covered with snow <sup>c</sup> Middle <sup>d</sup> Side <sup>e</sup> Top

Table S10. Values for Figure 11.

| Bark Pile                                        | UC <sup>a</sup> | UC              | UC              | UC              | UC   | UC     | UC   | UC    | UC    | UC    | C <sup>b</sup> | C    | C     | C     |
|--------------------------------------------------|-----------------|-----------------|-----------------|-----------------|------|--------|------|-------|-------|-------|----------------|------|-------|-------|
| Storage week                                     | 0               | 4M <sup>c</sup> | 4S <sup>d</sup> | 4T <sup>e</sup> | 12M  | 12S    | 12T  | 24M   | 24S   | 24T   | 0              | 24M  | 24S   | 24T   |
| Gluconic acid<br>(mg/g of d.m.)                  | 7.0             | 6.9             | 3.3             | 2.8             | 5.0  | 1.1    | 1.4  | 7.2   | 1.6   | 0.5   | 5.4            | 6.1  | 0.4   | 0.6   |
| Gluconic acid<br>SD                              | 0.7             | 0.8             | 0.6             | 0.1             | 0.1  | 0.02   | 0.1  | 0.5   | 0.1   | 0.1   | 0.4            | 0.4  | 0.005 | 0.04  |
| Citric acid<br>(mg/g of d.m.)                    | 6.7             | 1.4             | 1.7             | 0.7             | 0.7  | 0.1    | 0.2  | 1.0   | 0.2   | 0.04  | 5.0            | 0.4  | 0.02  | 0.02  |
| Citric acid<br>SD                                | 0.8             | 0.1             | 0.3             | 0.1             | 0.02 | 0.001  | 0.01 | 0.01  | 0.02  | 0.1   | 0.3            | 0.1  | 0.001 | 0.002 |
| Quinic acid<br>(mg/g of d.m.)                    | 7.1             | 3.6             | 1.7             | 1.0             | 1.9  | 0.1    | 0.3  | 2.8   | 0.3   | 0.0   | 6.3            | 0.9  | 0.003 | 0.0   |
| Quinic acid<br>SD                                | 0.8             | 0.3             | 0.1             | 0.1             | 0.1  | 0.0003 | 0.1  | 0.2   | 0.004 | 0.0   | 0.1            | 0.04 | 0.005 | 0.0   |
| Shikimic acid<br>(mg/g of d.m.)                  | 1.1             | 1.5             | 0.4             | 0.4             | 1.1  | 0.2    | 0.3  | 1.0   | 0.4   | 0.1   | 1.1            | 1.0  | 0.05  | 0.1   |
| Shikimic acid<br>SD                              | 0.02            | 0.2             | 0.1             | 0.004           | 0.4  | 0.001  | 0.02 | 0.03  | 0.02  | 0.1   | 0.04           | 0.01 | 0.004 | 0.004 |
| Malic acid<br>(mg/g of d.m.)                     | 0.8             | 0.4             | 0.2             | 0.1             | 0.2  | 0.0    | 0.0  | 0.4   | 0.03  | 0.05  | 0.7            | 0.2  | 0.04  | 0.1   |
| Malic acid<br>SD                                 | 0.1             | 0.1             | 0.02            | 0.0003          | 0.03 | 0.0    | 0.0  | 0.03  | 0.05  | 0.1   | 0.1            | 0.02 | 0.003 | 0.01  |
| L-Glutamic acid<br>(mg/g of d.m.)                | 0.3             | 1.2             | 1.5             | 1.2             | 5.9  | 0.8    | 1.0  | 11.9  | 1.4   | 0.4   | 0.3            | 8.0  | 0.1   | 0.1   |
| L-Glutamic acid<br>SD                            | 0.1             | 0.1             | 0.2             | 0.1             | 0.4  | 0.03   | 0.3  | 1.4   | 0.02  | 0.4   | 0.2            | 0.3  | 0.002 | 0.01  |
| 2,3-Dihydroxypropanoic<br>acid<br>(mg/g of d.m.) | 0.4             | 0.1             | 0.3             | 0.3             | 0.3  | 0.3    | 0.2  | 0.3   | 0.1   | 0.1   | 0.0            | 0.4  | 0.1   | 0.2   |
| 2,3-Dihydroxypropanoic<br>acid<br>SD             | 0.3             | 0.02            | 0.04            | 0.01            | 0.01 | 0.01   | 0.02 | 0.02  | 0.002 | 0.005 | 0.0            | 0.04 | 0.005 | 0.1   |
| 2,3-Dihydroxysuccinic acid<br>(mg/g of d.m.)     | 0.0             | 0.1             | 0.2             | 0.3             | 0.4  | 0.1    | 0.1  | 0.6   | 0.1   | 0.03  | 0.0            | 0.4  | 0.02  | 0.02  |
| 2,3-Dihydroxysuccinic acid<br>SD                 | 0.0             | 0.01            | 0.03            | 0.01            | 0.01 | 0.002  | 0.03 | 0.003 | 0.001 | 0.04  | 0.0            | 0.04 | 0.001 | 0.002 |
| Other<br>(mg/g of d.m.)                          | 0.2             | 0.7             | 0.9             | 0.7             | 0.6  | 0.2    | 0.1  | 0.8   | 0.1   | 0.1   | 0.0            | 1.2  | 0.3   | 0.2   |
| Other<br>SD                                      | 0.01            | 0.04            | 0.04            | 0.1             | 0.02 | 0.003  | 0.03 | 0.01  | 0.03  | 0.1   | 0.0            | 0.02 | 0.02  | 0.01  |

<sup>a</sup> Uncovered <sup>b</sup> Covered with snow <sup>c</sup> Middle <sup>d</sup> Side <sup>e</sup> Top

**Table S11.** Values for Figure 12.

| <b>Bark Pile</b>                  | <b>UC<sup>a</sup></b> | <b>UC</b>       | <b>UC</b>       | <b>UC</b>       | <b>UC</b> | <b>UC</b> | <b>UC</b> | <b>UC</b> | <b>UC</b> | <b>UC</b> | <b>C<sup>b</sup></b> | <b>C</b> | <b>C</b> | <b>C</b> |
|-----------------------------------|-----------------------|-----------------|-----------------|-----------------|-----------|-----------|-----------|-----------|-----------|-----------|----------------------|----------|----------|----------|
| Storage week                      | 0                     | 4M <sup>c</sup> | 4S <sup>d</sup> | 4T <sup>e</sup> | 12M       | 12S       | 12T       | 24M       | 24S       | 24T       | 0                    | 24M      | 24S      | 24T      |
| Distilbenes<br>(mg/g of d.m.)     | 16.9                  | 5.1             | 4.2             | 3.8             | 5.3       | 3.4       | 3.9       | 2.1       | 2.4       | 2.1       | 14.7                 | 0.0      | 0.0      | 0.0      |
| Distilbenes<br>SD                 | 0.8                   | 0.6             | 0.4             | 0.8             | 0.2       | 0.9       | 0.1       | 0.9       | 1.5       | 0.4       | 2.2                  | 0.0      | 0.0      | 0.0      |
| Sesquistilbenes<br>(mg/g of d.m.) | 16.4                  | 4.3             | 4.8             | 3.6             | 6.1       | 3.1       | 4.3       | 1.1       | 1.6       | 0.6       | 20.9                 | 0.0      | 0.0      | 0.0      |
| Sesquistilbenes<br>SD             | 0.1                   | 0.1             | 0.5             | 1.3             | 0.8       | 0.9       | 0.001     | 0.1       | 0.5       | 0.2       | 2.4                  | 0.0      | 0.0      | 0.0      |
| Isorhapontin<br>(mg/g of d.m.)    | 9.5                   | 0.2             | 0.1             | 0.05            | 0.04      | 0.1       | 0.03      | 0.0       | 0.0       | 0.0       | 11.4                 | 0.0      | 0.0      | 0.0      |
| Isorhapontin<br>SD                | 1.7                   | 0.1             | 0.003           | 0.003           | 0.001     | 0.0004    | 0.001     | 0.0       | 0.0       | 0.0       | 0.4                  | 0.0      | 0.0      | 0.0      |
| Astringin<br>(mg/g of d.m.)       | 4.8                   | 0.1             | 0.1             | 0.04            | 0.05      | 0.1       | 0.03      | 0.0       | 0.0       | 0.0       | 5.2                  | 0.0      | 0.0      | 0.0      |
| Astringin<br>SD                   | 1.1                   | 0.1             | 0.1             | 0.01            | 0.005     | 0.01      | 0.003     | 0.0       | 0.0       | 0.0       | 0.3                  | 0.0      | 0.0      | 0.0      |
| Piceid<br>(mg/g of d.m.)          | 3.2                   | 0.1             | 0.1             | 0.05            | 0.1       | 0.04      | 0.04      | 0.0       | 0.0       | 0.0       | 4.3                  | 0.0      | 0.0      | 0.0      |
| Piceid<br>SD                      | 0.7                   | 0.1             | 0.01            | 0.01            | 0.002     | 0.004     | 0.002     | 0.0       | 0.0       | 0.0       | 0.2                  | 0.0      | 0.0      | 0.0      |
| Rhapontigenin<br>(mg/g of d.m.)   | 1.3                   | 0.5             | 0.1             | 0.1             | 0.1       | 0.1       | 0.04      | 0.02      | 0.02      | 0.02      | 1.6                  | 0.05     | 0.04     | 0.04     |
| Rhapontigenin<br>SD               | 0.2                   | 0.02            | 0.001           | 0.001           | 0.005     | 0.01      | 0.002     | 0.03      | 0.03      | 0.03      | 0.4                  | 0.02     | 0.01     | 0.003    |
| Piceatannol<br>(mg/g of d.m.)     | 0.4                   | 0.9             | 0.3             | 0.4             | 0.1       | 0.1       | 0.1       | 0.2       | 0.1       | 0.1       | 0.3                  | 0.1      | 0.05     | 0.1      |
| Piceatannol<br>SD                 | 0.03                  | 0.04            | 0.03            | 0.03            | 0.003     | 0.01      | 0.001     | 0.05      | 0.004     | 0.1       | 0.1                  | 0.03     | 0.003    | 0.0002   |
| Resveratrol<br>(mg/g of d.m.)     | 0.2                   | 0.9             | 0.1             | 0.1             | 0.1       | 0.1       | 0.1       | 0.1       | 0.1       | 0.04      | 0.2                  | 0.1      | 0.1      | 0.1      |
| Resveratrol<br>SD                 | 0.01                  | 0.1             | 0.01            | 0.005           | 0.002     | 0.01      | 0.0003    | 0.02      | 0.01      | 0.1       | 0.02                 | 0.02     | 0.01     | 0.003    |

<sup>a</sup> Uncovered <sup>b</sup> Covered with snow <sup>c</sup> Middle <sup>d</sup> Side <sup>e</sup> Top

Table S12. Values for Figure 13.

| Bark Pile                               | UC <sup>a</sup> | UC              | UC              | UC              | UC     | UC     | UC   | UC   | UC   | UC  | C <sup>b</sup> | C    | C     | C      |
|-----------------------------------------|-----------------|-----------------|-----------------|-----------------|--------|--------|------|------|------|-----|----------------|------|-------|--------|
| Storage week                            | 0               | 4M <sup>c</sup> | 4S <sup>d</sup> | 4T <sup>e</sup> | 12M    | 12S    | 12T  | 24M  | 24S  | 24T | 0              | 24M  | 24S   | 24T    |
| Taxifolin glycoside (mg/g of d.m.)      | 1.5             | 0.2             | 0.1             | 0.1             | 0.0    | 0.0    | 0.0  | 0.0  | 0.0  | 0.0 | 1.5            | 0.0  | 0.0   | 0.0    |
| Taxifolin glycoside SD                  | 0.05            | 0.04            | 0.01            | 0.003           | 0.0    | 0.0    | 0.0  | 0.0  | 0.0  | 0.0 | 0.7            | 0.0  | 0.0   | 0.0    |
| Naringin (mg/g of d.m.)                 | 1.4             | 0.5             | 0.1             | 0.1             | 0.0    | 0.0    | 0.0  | 0.0  | 0.0  | 0.0 | 1.3            | 0.0  | 0.0   | 0.0    |
| Naringin SD                             | 0.5             | 0.03            | 0.1             | 0.001           | 0.0    | 0.0    | 0.0  | 0.0  | 0.0  | 0.0 | 0.3            | 0.0  | 0.0   | 0.0    |
| Catechin (mg/g of d.m.)                 | 1.1             | 0.3             | 0.0             | 0.1             | 0.03   | 0.0    | 0.0  | 0.0  | 0.0  | 0.0 | 1.0            | 0.04 | 0.02  | 0.02   |
| Catechin SD                             | 0.1             | 0.04            | 0.0             | 0.003           | 0.04   | 0.0    | 0.0  | 0.0  | 0.0  | 0.0 | 0.2            | 0.02 | 0.002 | 0.0002 |
| Taxifolin (mg/g of d.m.)                | 1.0             | 0.2             | 0.1             | 0.1             | 0.1    | 0.1    | 0.1  | 0.1  | 0.0  | 0.0 | 0.9            | 0.2  | 0.04  | 0.05   |
| Taxifolin SD                            | 0.2             | 0.01            | 0.003           | 0.001           | 0.002  | 0.0002 | 0.01 | 0.04 | 0.0  | 0.0 | 0.2            | 0.02 | 0.003 | 0.004  |
| Neohesperidin (mg/g of d.m.)            | 0.7             | 0.0             | 0.0             | 0.0             | 0.0    | 0.0    | 0.0  | 0.0  | 0.0  | 0.0 | 0.3            | 0.0  | 0.0   | 0.0    |
| Neohesperidin SD                        | 0.02            | 0.0             | 0.0             | 0.0             | 0.0    | 0.0    | 0.0  | 0.0  | 0.0  | 0.0 | 0.5            | 0.0  | 0.0   | 0.0    |
| Naringenin chal-<br>cone (mg/g of d.m.) | 0.3             | 0.4             | 0.4             | 0.2             | 0.1    | 0.1    | 0.2  | 0.1  | 0.0  | 0.0 | 0.0            | 0.3  | 0.03  | 0.02   |
| Naringenin chal-<br>cone SD             | 0.03            | 0.02            | 0.02            | 0.1             | 0.0004 | 0.01   | 0.03 | 0.01 | 0.0  | 0.0 | 0.0            | 0.1  | 0.004 | 0.004  |
| Dihydromyricetin (mg/g of d.m.)         | 0.3             | 0.6             | 0.2             | 0.2             | 0.2    | 0.1    | 0.1  | 0.2  | 0.03 | 0.1 | 0.1            | 0.5  | 0.04  | 0.1    |
| Dihydromyricetin SD                     | 0.03            | 0.1             | 0.02            | 0.001           | 0.01   | 0.01   | 0.01 | 0.1  | 0.04 | 0.1 | 0.1            | 0.1  | 0.01  | 0.01   |
| Luteolin (mg/g of d.m.)                 | 0.0             | 0.0             | 0.0             | 0.1             | 0.04   | 0.0    | 0.0  | 0.0  | 0.0  | 0.0 | 0.0            | 0.0  | 0.0   | 0.0    |
| Luteolin SD                             | 0.0             | 0.0             | 0.0             | 0.0003          | 0.003  | 0.0    | 0.0  | 0.0  | 0.0  | 0.0 | 0.0            | 0.0  | 0.0   | 0.0    |

<sup>a</sup> Uncovered <sup>b</sup> Covered with snow <sup>c</sup> Middle <sup>d</sup> Side <sup>e</sup> Top

**Table S13.** Values for Figure 14.

| <b>Bark Pile</b>                    | <b>UC<sup>a</sup></b> | <b>UC</b>       | <b>UC</b>       | <b>UC</b>       | <b>UC</b> | <b>UC</b> | <b>UC</b> | <b>UC</b> | <b>UC</b> | <b>UC</b> | <b>C<sup>b</sup></b> | <b>C</b> | <b>C</b> | <b>C</b> |
|-------------------------------------|-----------------------|-----------------|-----------------|-----------------|-----------|-----------|-----------|-----------|-----------|-----------|----------------------|----------|----------|----------|
| Storage week                        | 0                     | 4M <sup>c</sup> | 4S <sup>d</sup> | 4T <sup>e</sup> | 12M       | 12S       | 12T       | 24M       | 24S       | 24T       | 0                    | 24M      | 24S      | 24T      |
| Procyanidins<br>(g/100g of d.m.)    | 2.8                   | 1.3             | 0.6             | 0.5             | 0.4       | 0.4       | 0.3       | 0.3       | 0.3       | 0.2       | 2.9                  | 0.5      | 0.2      | 0.3      |
| Procyanidins<br>SD                  | 0.2                   | 0.1             | 0.03            | 0.04            | 0.02      | 0.04      | 0.03      | 0.02      | 0.03      | 0.02      | 0.1                  | 0.05     | 0.02     | 0.02     |
| Prodelphinidins<br>(g/100g of d.m.) | 0.2                   | 0.1             | 0.1             | 0.1             | 0.1       | 0.1       | 0.1       | 0.1       | 0.04      | 0.03      | 0.3                  | 0.1      | 0.04     | 0.04     |
| Prodelphinidins<br>SD               | 0.02                  | 0.01            | 0.01            | 0.003           | 0.01      | 0.01      | 0.01      | 0.005     | 0.004     | 0.003     | 0.01                 | 0.01     | 0.002    | 0.003    |
| Degree of polymerisa-<br>tion       | 8.0                   | 5.7             | 2.8             | 2.6             | 2.4       | 2.5       | 2.4       | 2.2       | 2.1       | 2.3       | 8.2                  | 2.9      | 2.6      | 3.0      |
| Degree of polymerisa-<br>tion<br>SD | 0.2                   | 0.3             | 0.1             | 0.1             | 0.1       | 0.2       | 0.1       | 0.1       | 0.1       | 0.1       | 0.3                  | 0.2      | 0.2      | 0.3      |

<sup>a</sup> Uncovered <sup>b</sup> Covered with snow <sup>c</sup> Middle <sup>d</sup> Side <sup>e</sup> Top



**Table S14.** Values for Figure 15.

| <b>Bark Pile</b>         | <b>UC<sup>a</sup></b> | <b>UC</b>        | <b>UC</b>        | <b>UC</b>        | <b>C<sup>b</sup></b> | <b>C</b> | <b>C</b> | <b>C</b> |
|--------------------------|-----------------------|------------------|------------------|------------------|----------------------|----------|----------|----------|
| Storage week             | 0                     | 24M <sup>c</sup> | 24S <sup>d</sup> | 24T <sup>e</sup> | 0                    | 24M      | 24S      | 24T      |
| Glucose<br>(% of d.m.)   | 38.5                  | 34.1             | 31.8             | 29.9             | 35.3                 | 31.2     | 30.0     | 30.7     |
| Glucose<br>SD            | 0.6                   | 0.5              | 0.6              | 0.6              | 0.6                  | 0.7      | 1.0      | 0.6      |
| Arabinose<br>(% of d.m.) | 7.8                   | 1.6              | 2.9              | 2.3              | 7.6                  | 3.3      | 2.5      | 3.6      |
| Arabinose<br>SD          | 0.2                   | 0.02             | 0.02             | 0.1              | 0.1                  | 0.1      | 0.1      | 0.1      |
| Xylose<br>(% of d.m.)    | 4.8                   | 3.8              | 3.7              | 3.5              | 4.4                  | 3.5      | 3.1      | 3.2      |
| Xylose<br>SD             | 0.2                   | 0.2              | 0.1              | 0.1              | 0.2                  | 0.1      | 0.1      | 0.1      |
| Mannose<br>(% of d.m.)   | 4.3                   | 3.7              | 4.0              | 3.3              | 4.2                  | 2.7      | 2.7      | 2.9      |
| Mannose<br>SD            | 0.1                   | 0.3              | 0.1              | 0.1              | 0.3                  | 0.1      | 0.1      | 0.1      |
| Galactose<br>(% of d.m.) | 2.8                   | 1.7              | 1.8              | 1.8              | 2.5                  | 2.0      | 1.7      | 1.8      |
| Galactose<br>SD          | 0.05                  | 0.02             | 0.05             | 0.1              | 0.05                 | 0.1      | 0.1      | 0.05     |

<sup>a</sup> Uncovered <sup>b</sup> Covered with snow <sup>c</sup> Middle <sup>d</sup> Side <sup>e</sup> Top

**Table S15.** Values for Figure 16.

| <b>Bark Pile</b>                    | <b>UC<sup>a</sup></b> | <b>UC</b>       | <b>UC</b>       | <b>UC</b>       | <b>UC</b> | <b>UC</b> | <b>UC</b> | <b>UC</b> | <b>UC</b> | <b>UC</b> |
|-------------------------------------|-----------------------|-----------------|-----------------|-----------------|-----------|-----------|-----------|-----------|-----------|-----------|
| Storage week                        | 0                     | 4M <sup>c</sup> | 4S <sup>d</sup> | 4T <sup>e</sup> | 12M       | 12S       | 12T       | 24M       | 24S       | 24T       |
| Galacturonic acid<br>(mg/g of d.m.) | 93.9                  | 86.9            | 83.1            | 80.8            | 79.8      | 59.4      | 42.2      | 43.6      | 42.9      | 44.0      |
| Galacturonic acid<br>SD             | 7.3                   | 12.0            | 2.3             | 0.5             | 8.5       | 26.5      | 3.2       | 0.04      | 5.0       | 2.0       |
| Arabinose<br>(mg/g of d.m.)         | 69.4                  | 54.1            | 32.9            | 31.3            | 28.1      | 28.3      | 44.0      | 23.4      | 29.6      | 37.6      |
| Arabinose<br>SD                     | 0.4                   | 0.2             | 2.0             | 0.3             | 6.9       | 5.3       | 8.3       | 1.3       | 4.0       | 0.2       |
| Xylose<br>(mg/g of d.m.)            | 39.2                  | 30.3            | 29.3            | 29.1            | 44.4      | 41.3      | 49.4      | 52.6      | 48.0      | 50.9      |
| Xylose<br>SD                        | 1.8                   | 4.7             | 4.7             | 0.6             | 5.8       | 9.5       | 2.7       | 0.6       | 4.2       | 0.9       |
| Galactose<br>(mg/g of d.m.)         | 38.2                  | 28.4            | 20.0            | 18.8            | 22.6      | 25.6      | 34.1      | 33.3      | 31.7      | 34.0      |
| Galactose<br>SD                     | 0.8                   | 4.7             | 1.3             | 1.3             | 3.1       | 9.0       | 3.5       | 1.4       | 3.4       | 0.4       |
| Glucose<br>(mg/g of d.m.)           | 30.0                  | 31.9            | 39.1            | 38.3            | 49.0      | 45.2      | 46.2      | 53.5      | 54.2      | 54.3      |
| Glucose<br>SD                       | 0.6                   | 1.1             | 3.5             | 4.4             | 6.1       | 7.7       | 3.3       | 1.8       | 4.7       | 0.9       |
| Mannose<br>(mg/g of d.m.)           | 23.0                  | 16.7            | 19.1            | 16.2            | 23.5      | 25.4      | 28.8      | 26.7      | 22.5      | 31.8      |
| Mannose<br>SD                       | 3.3                   | 1.6             | 5.1             | 3.2             | 1.0       | 5.0       | 1.2       | 1.4       | 1.0       | 5.0       |
| Rhamnose<br>(mg/g of d.m.)          | 9.4                   | 7.7             | 5.7             | 6.0             | 7.8       | 5.5       | 7.2       | 5.4       | 6.0       | 6.8       |
| Rhamnose<br>SD                      | 0.2                   | 0.1             | 0.4             | 0.7             | 2.3       | 0.9       | 1.3       | 0.2       | 0.9       | 0.2       |
| Glucuronic acid<br>(mg/g of d.m.)   | 4.0                   | 3.3             | 1.1             | 1.0             | 2.6       | 1.5       | 6.6       | 1.9       | 1.6       | 1.3       |
| Glucuronic acid<br>SD               | 0.9                   | 0.04            | 0.4             | 0.3             | 1.8       | 0.1       | 7.3       | 1.0       | 0.3       | 0.3       |

<sup>a</sup> Uncovered <sup>b</sup> Covered with snow <sup>c</sup> Middle <sup>d</sup> Side <sup>e</sup> Top
